# Supplementary material for: Detection of Allosteric Effects of lncRNA Secondary Structures Altered by SNPs in Human Diseases
Source: Front Cell Dev Biol. 2020 Apr 8;8:242. doi: 10.3389/fcell.2020.00242 (PMC7156602; doi:10.3389/fcell.2020.00242)
Supplement: TABLE S1 — LD SNPs mapping on lncRNA transcripts. [file Table_1.XLSX]

## Sheet: Sheet1
Supplementary Table S1 LD SNPs mapping on lncRNA transcripts
LncRNA transcripts	LncRNA symbols	Length of lncRNAs	Disease-associated SNP	LD SNPs	Diseases	SNP alleles
ENST00000426643.1	HCG23	610	rs3817963	rs117130854	Adenocarcinoma of lung	A146G
ENST00000426643.1	HCG23	610	rs3817963	rs115303880	Adenocarcinoma of lung	G173T
ENST00000426643.1	HCG23	610	rs3817963	rs17495612	Adenocarcinoma of lung	C286T
ENST00000426643.1	HCG23	610	rs3817963	rs60538826	Adenocarcinoma of lung	C320T
ENST00000426643.1	HCG23	610	rs3817963	rs149171231	Adenocarcinoma of lung	C322T
ENST00000426643.1	HCG23	610	rs3817963	rs146487240	Adenocarcinoma of lung	A324T
ENST00000426643.1	HCG23	610	rs3817963	rs549096164	Adenocarcinoma of lung	C334T
ENST00000426643.1	HCG23	610	rs3817963	rs561411181	Adenocarcinoma of lung	G338T
ENST00000426643.1	HCG23	610	rs3817963	rs117026188	Adenocarcinoma of lung	A516G
ENST00000426643.1	HCG23	610	rs3817963	rs3817969	Adenocarcinoma of lung	A535G
ENST00000577385.1	AC134407.1	709	rs7216064	rs12449442	Adenocarcinoma of lung	A223G
ENST00000624035.1	AC134407.3	2139	rs7216064	rs62086044	Adenocarcinoma of lung	G788T
ENST00000625089.1	AC134407.2	1978	rs7216064	rs77706698	Adenocarcinoma of lung	A1919G
ENST00000642577.1	HCG23	2583	rs3817963	rs17208657	Adenocarcinoma of lung	C322T
ENST00000642577.1	HCG23	2583	rs3817963	rs57652561	Adenocarcinoma of lung	C340T
ENST00000642577.1	HCG23	2583	rs3817963	rs12525722	Adenocarcinoma of lung	A341G
ENST00000642577.1	HCG23	2583	rs3817963	rs117384660	Adenocarcinoma of lung	A380G
ENST00000642577.1	HCG23	2583	rs3817963	rs17202309	Adenocarcinoma of lung	C391T
ENST00000642577.1	HCG23	2583	rs3817963	rs9268475	Adenocarcinoma of lung	C409T
ENST00000642577.1	HCG23	2583	rs3817963	rs3117099	Adenocarcinoma of lung	C448T
ENST00000642577.1	HCG23	2583	rs3817963	rs117130854	Adenocarcinoma of lung	A610G
ENST00000642577.1	HCG23	2583	rs3817963	rs115303880	Adenocarcinoma of lung	G637T
ENST00000644884.1	HCG23	1109	rs3817963	rs17202218	Adenocarcinoma of lung	C49T
ENST00000644884.1	HCG23	1109	rs3817963	rs17208573	Adenocarcinoma of lung	A331G
ENST00000644884.1	HCG23	1109	rs3817963	rs17208580	Adenocarcinoma of lung	A349T
ENST00000644884.1	HCG23	1109	rs3817963	rs17208657	Adenocarcinoma of lung	C701T
ENST00000644884.1	HCG23	1109	rs3817963	rs57652561	Adenocarcinoma of lung	C719T
ENST00000644884.1	HCG23	1109	rs3817963	rs12525722	Adenocarcinoma of lung	A720G
ENST00000644884.1	HCG23	1109	rs3817963	rs117384660	Adenocarcinoma of lung	A759G
ENST00000644884.1	HCG23	1109	rs3817963	rs17202309	Adenocarcinoma of lung	C770T
ENST00000644884.1	HCG23	1109	rs3817963	rs9268475	Adenocarcinoma of lung	C788T
ENST00000644884.1	HCG23	1109	rs3817963	rs3117099	Adenocarcinoma of lung	C827T
ENST00000644884.1	HCG23	1109	rs3817963	rs117130854	Adenocarcinoma of lung	A989G
ENST00000644884.1	HCG23	1109	rs3817963	rs115303880	Adenocarcinoma of lung	G1016T
ENST00000644884.1	HCG23	1109	rs3817963	rs3117098	Adenocarcinoma of lung	C1070T
ENST00000645134.1	HCG23	2502	rs3817963	rs17208657	Adenocarcinoma of lung	C241T
ENST00000645134.1	HCG23	2502	rs3817963	rs57652561	Adenocarcinoma of lung	C259T
ENST00000645134.1	HCG23	2502	rs3817963	rs12525722	Adenocarcinoma of lung	A260G
ENST00000645134.1	HCG23	2502	rs3817963	rs117384660	Adenocarcinoma of lung	A299G
ENST00000645134.1	HCG23	2502	rs3817963	rs17202309	Adenocarcinoma of lung	C310T
ENST00000645134.1	HCG23	2502	rs3817963	rs9268475	Adenocarcinoma of lung	C328T
ENST00000645134.1	HCG23	2502	rs3817963	rs3117099	Adenocarcinoma of lung	C367T
ENST00000645134.1	HCG23	2502	rs3817963	rs117130854	Adenocarcinoma of lung	A529G
ENST00000645134.1	HCG23	2502	rs3817963	rs115303880	Adenocarcinoma of lung	G556T
ENST00000646550.1	HCG23	899	rs3817963	rs17208657	Adenocarcinoma of lung	C492T
ENST00000646550.1	HCG23	899	rs3817963	rs57652561	Adenocarcinoma of lung	C510T
ENST00000646550.1	HCG23	899	rs3817963	rs12525722	Adenocarcinoma of lung	A511G
ENST00000646550.1	HCG23	899	rs3817963	rs117384660	Adenocarcinoma of lung	A550G
ENST00000646550.1	HCG23	899	rs3817963	rs17202309	Adenocarcinoma of lung	C561T
ENST00000646550.1	HCG23	899	rs3817963	rs9268475	Adenocarcinoma of lung	C579T
ENST00000646550.1	HCG23	899	rs3817963	rs3117099	Adenocarcinoma of lung	C618T
ENST00000646550.1	HCG23	899	rs3817963	rs117130854	Adenocarcinoma of lung	A780G
ENST00000646550.1	HCG23	899	rs3817963	rs115303880	Adenocarcinoma of lung	G807T
ENST00000646550.1	HCG23	899	rs3817963	rs3117098	Adenocarcinoma of lung	C861T
ENST00000646628.1	HCG23	1853	rs3817963	rs9268474	Adenocarcinoma of lung	C231T
ENST00000646628.1	HCG23	1853	rs3817963	rs17208657	Adenocarcinoma of lung	C418T
ENST00000646628.1	HCG23	1853	rs3817963	rs57652561	Adenocarcinoma of lung	C436T
ENST00000646628.1	HCG23	1853	rs3817963	rs12525722	Adenocarcinoma of lung	A437G
ENST00000646628.1	HCG23	1853	rs3817963	rs117384660	Adenocarcinoma of lung	A476G
ENST00000646628.1	HCG23	1853	rs3817963	rs17202309	Adenocarcinoma of lung	C487T
ENST00000646628.1	HCG23	1853	rs3817963	rs9268475	Adenocarcinoma of lung	C505T
ENST00000646628.1	HCG23	1853	rs3817963	rs3117099	Adenocarcinoma of lung	C544T
ENST00000646628.1	HCG23	1853	rs3817963	rs117130854	Adenocarcinoma of lung	A706G
ENST00000646628.1	HCG23	1853	rs3817963	rs115303880	Adenocarcinoma of lung	G733T
ENST00000646628.1	HCG23	1853	rs3817963	rs3117098	Adenocarcinoma of lung	C787T
ENST00000646628.1	HCG23	1853	rs3817963	rs17495592	Adenocarcinoma of lung	A807G
ENST00000646628.1	HCG23	1853	rs3817963	rs117886263	Adenocarcinoma of lung	A940G
ENST00000646628.1	HCG23	1853	rs3817963	rs117030612	Adenocarcinoma of lung	C1174T
ENST00000646628.1	HCG23	1853	rs3817963	rs117680060	Adenocarcinoma of lung	A1230G
ENST00000646628.1	HCG23	1853	rs3817963	rs9268477	Adenocarcinoma of lung	A1395G
ENST00000646628.1	HCG23	1853	rs3817963	rs118171271	Adenocarcinoma of lung	G1423T
ENST00000646628.1	HCG23	1853	rs3817963	rs117177076	Adenocarcinoma of lung	A1424G
ENST00000646628.1	HCG23	1853	rs3817963	rs118094977	Adenocarcinoma of lung	C1459T
ENST00000646628.1	HCG23	1853	rs3817963	rs116854236	Adenocarcinoma of lung	A1460G
ENST00000646628.1	HCG23	1853	rs3817963	rs117691618	Adenocarcinoma of lung	A1574G
ENST00000646628.1	HCG23	1853	rs3817963	rs116938180	Adenocarcinoma of lung	C1605T
ENST00000646628.1	HCG23	1853	rs3817963	rs17495612	Adenocarcinoma of lung	C1705T
ENST00000646628.1	HCG23	1853	rs3817963	rs60538826	Adenocarcinoma of lung	C1739T
ENST00000646628.1	HCG23	1853	rs3817963	rs149171231	Adenocarcinoma of lung	C1741T
ENST00000646628.1	HCG23	1853	rs3817963	rs146487240	Adenocarcinoma of lung	A1743T
ENST00000646628.1	HCG23	1853	rs3817963	rs549096164	Adenocarcinoma of lung	C1753T
ENST00000646628.1	HCG23	1853	rs3817963	rs561411181	Adenocarcinoma of lung	G1757T
ENST00000646628.1	HCG23	1853	rs3817963	rs116993778	Adenocarcinoma of lung	A1781G
ENST00000647036.1	HCG23	2281	rs3817963	rs17208657	Adenocarcinoma of lung	C717T
ENST00000647036.1	HCG23	2281	rs3817963	rs57652561	Adenocarcinoma of lung	C735T
ENST00000647036.1	HCG23	2281	rs3817963	rs12525722	Adenocarcinoma of lung	A736G
ENST00000647036.1	HCG23	2281	rs3817963	rs117384660	Adenocarcinoma of lung	A775G
ENST00000647036.1	HCG23	2281	rs3817963	rs17202309	Adenocarcinoma of lung	C786T
ENST00000647036.1	HCG23	2281	rs3817963	rs9268475	Adenocarcinoma of lung	C804T
ENST00000647036.1	HCG23	2281	rs3817963	rs3117099	Adenocarcinoma of lung	C843T
ENST00000647036.1	HCG23	2281	rs3817963	rs117130854	Adenocarcinoma of lung	A1005G
ENST00000647036.1	HCG23	2281	rs3817963	rs115303880	Adenocarcinoma of lung	G1032T
ENST00000647036.1	HCG23	2281	rs3817963	rs3117098	Adenocarcinoma of lung	C1086T
ENST00000647036.1	HCG23	2281	rs3817963	rs17495592	Adenocarcinoma of lung	A1106G
ENST00000647036.1	HCG23	2281	rs3817963	rs117886263	Adenocarcinoma of lung	A1239G
ENST00000647036.1	HCG23	2281	rs3817963	rs117030612	Adenocarcinoma of lung	C1473T
ENST00000647036.1	HCG23	2281	rs3817963	rs117680060	Adenocarcinoma of lung	A1529G
ENST00000647036.1	HCG23	2281	rs3817963	rs9268477	Adenocarcinoma of lung	A1694G
ENST00000647036.1	HCG23	2281	rs3817963	rs118171271	Adenocarcinoma of lung	G1722T
ENST00000647036.1	HCG23	2281	rs3817963	rs117177076	Adenocarcinoma of lung	A1723G
ENST00000647036.1	HCG23	2281	rs3817963	rs118094977	Adenocarcinoma of lung	C1758T
ENST00000647036.1	HCG23	2281	rs3817963	rs116854236	Adenocarcinoma of lung	A1759G
ENST00000647036.1	HCG23	2281	rs3817963	rs117691618	Adenocarcinoma of lung	A1873G
ENST00000647036.1	HCG23	2281	rs3817963	rs116938180	Adenocarcinoma of lung	C1904T
ENST00000647036.1	HCG23	2281	rs3817963	rs17495612	Adenocarcinoma of lung	C2004T
ENST00000647036.1	HCG23	2281	rs3817963	rs60538826	Adenocarcinoma of lung	C2038T
ENST00000647036.1	HCG23	2281	rs3817963	rs149171231	Adenocarcinoma of lung	C2040T
ENST00000647036.1	HCG23	2281	rs3817963	rs146487240	Adenocarcinoma of lung	A2042T
ENST00000647036.1	HCG23	2281	rs3817963	rs549096164	Adenocarcinoma of lung	C2052T
ENST00000647036.1	HCG23	2281	rs3817963	rs561411181	Adenocarcinoma of lung	G2056T
ENST00000647036.1	HCG23	2281	rs3817963	rs116993778	Adenocarcinoma of lung	A2080G
ENST00000647036.1	HCG23	2281	rs3817963	rs118169940	Adenocarcinoma of lung	G2144T
ENST00000647036.1	HCG23	2281	rs3817963	rs117231421	Adenocarcinoma of lung	C2159T
ENST00000647036.1	HCG23	2281	rs3817963	rs118079998	Adenocarcinoma of lung	C2176T
ENST00000647036.1	HCG23	2281	rs3817963	rs72847907	Adenocarcinoma of lung	A2184G
