# Supplementary material for: Detection of Allosteric Effects of lncRNA Secondary Structures Altered by SNPs in Human Diseases
Source: Front Cell Dev Biol. 2020 Apr 8;8:242. doi: 10.3389/fcell.2020.00242 (PMC7156602; doi:10.3389/fcell.2020.00242)
Supplement: TABLE S4 — The significance of lncRNA structural heterogeneity by RS2. [file Table_4.XLSX]

## Sheet: Sheet1
Supplementary Table S4 The significance of lncRNA structural heterogeneity by RS2
LncRNA transcripts	LncRNA symbols	LD SNPs	SNP alleles	Diseases	RNAsmc score	RS2
ENST00000426643.1	HCG23	rs117130854	A146G	Adenocarcinoma of lung	8.13632	0.196721
ENST00000426643.1	HCG23	rs115303880	G173T	Adenocarcinoma of lung	8.17144	0.202186
ENST00000426643.1	HCG23	rs17495612	C286T	Adenocarcinoma of lung	5.60579	0.00382305
ENST00000426643.1	HCG23	rs60538826	C320T	Adenocarcinoma of lung	6.68757	0.0595628
ENST00000426643.1	HCG23	rs149171231	C322T	Adenocarcinoma of lung	6.90397	0.107104
ENST00000426643.1	HCG23	rs146487240	A324T	Adenocarcinoma of lung	7.01802	0.108743
ENST00000426643.1	HCG23	rs549096164	C334T	Adenocarcinoma of lung	9.74575	0.289071
ENST00000426643.1	HCG23	rs561411181	G338T	Adenocarcinoma of lung	9.01881	0.240437
ENST00000426643.1	HCG23	rs117026188	A516G	Adenocarcinoma of lung	10	NA
ENST00000426643.1	HCG23	rs3817969	A535G	Adenocarcinoma of lung	5.60613	0.0103768
ENST00000577385.1	AC134407.1	rs12449442	A223G	Adenocarcinoma of lung	9.74928	0.196991
ENST00000624035.1	AC134407.3	rs62086044	G788T	Adenocarcinoma of lung	9.93455	0.261649
ENST00000625089.1	AC134407.2	rs77706698	A1919G	Adenocarcinoma of lung	10	NA
ENST00000642577.1	HCG23	rs17208657	C322T	Adenocarcinoma of lung	9.91359	0.332771
ENST00000642577.1	HCG23	rs57652561	C340T	Adenocarcinoma of lung	9.99249	0.391463
ENST00000642577.1	HCG23	rs12525722	A341G	Adenocarcinoma of lung	7.43041	0.119068
ENST00000642577.1	HCG23	rs117384660	A380G	Adenocarcinoma of lung	10	NA
ENST00000642577.1	HCG23	rs17202309	C391T	Adenocarcinoma of lung	10	NA
ENST00000642577.1	HCG23	rs9268475	C409T	Adenocarcinoma of lung	9.89615	0.322662
ENST00000642577.1	HCG23	rs3117099	C448T	Adenocarcinoma of lung	9.94199	0.346251
ENST00000642577.1	HCG23	rs117130854	A610G	Adenocarcinoma of lung	9.89455	0.321258
ENST00000642577.1	HCG23	rs115303880	G637T	Adenocarcinoma of lung	10	NA
ENST00000644884.1	HCG23	rs17202218	C49T	Adenocarcinoma of lung	9.92938	0.281334
ENST00000644884.1	HCG23	rs17208573	A331G	Adenocarcinoma of lung	9.89379	0.266907
ENST00000644884.1	HCG23	rs17208580	A349T	Adenocarcinoma of lung	9.48073	0.134956
ENST00000644884.1	HCG23	rs17208657	C701T	Adenocarcinoma of lung	9.81322	0.227833
ENST00000644884.1	HCG23	rs57652561	C719T	Adenocarcinoma of lung	10	NA
ENST00000644884.1	HCG23	rs12525722	A720G	Adenocarcinoma of lung	10	NA
ENST00000644884.1	HCG23	rs117384660	A759G	Adenocarcinoma of lung	10	NA
ENST00000644884.1	HCG23	rs17202309	C770T	Adenocarcinoma of lung	10	NA
ENST00000644884.1	HCG23	rs9268475	C788T	Adenocarcinoma of lung	9.77598	0.218215
ENST00000644884.1	HCG23	rs3117099	C827T	Adenocarcinoma of lung	9.79917	0.226029
ENST00000644884.1	HCG23	rs117130854	A989G	Adenocarcinoma of lung	8.13046	0.0351668
ENST00000644884.1	HCG23	rs115303880	G1016T	Adenocarcinoma of lung	8.09478	0.035768
ENST00000644884.1	HCG23	rs3117098	C1070T	Adenocarcinoma of lung	9.63396	0.185152
ENST00000645134.1	HCG23	rs17208657	C241T	Adenocarcinoma of lung	9.91132	0.27045
ENST00000645134.1	HCG23	rs57652561	C259T	Adenocarcinoma of lung	8.39419	0.0424993
ENST00000645134.1	HCG23	rs12525722	A260G	Adenocarcinoma of lung	10	NA
ENST00000645134.1	HCG23	rs117384660	A299G	Adenocarcinoma of lung	10	NA
ENST00000645134.1	HCG23	rs17202309	C310T	Adenocarcinoma of lung	10	NA
ENST00000645134.1	HCG23	rs9268475	C328T	Adenocarcinoma of lung	9.89588	0.260858
ENST00000645134.1	HCG23	rs3117099	C367T	Adenocarcinoma of lung	9.93831	0.285372
ENST00000645134.1	HCG23	rs117130854	A529G	Adenocarcinoma of lung	9.86613	0.246603
ENST00000645134.1	HCG23	rs115303880	G556T	Adenocarcinoma of lung	10	NA
ENST00000646550.1	HCG23	rs17208657	C492T	Adenocarcinoma of lung	9.78219	0.245458
ENST00000646550.1	HCG23	rs57652561	C510T	Adenocarcinoma of lung	9.46286	0.209121
ENST00000646550.1	HCG23	rs12525722	A511G	Adenocarcinoma of lung	9.82021	0.265109
ENST00000646550.1	HCG23	rs117384660	A550G	Adenocarcinoma of lung	6.24588	0.0496848
ENST00000646550.1	HCG23	rs17202309	C561T	Adenocarcinoma of lung	10	NA
ENST00000646550.1	HCG23	rs9268475	C579T	Adenocarcinoma of lung	6.24759	0.0515387
ENST00000646550.1	HCG23	rs3117099	C618T	Adenocarcinoma of lung	9.71451	0.233222
ENST00000646550.1	HCG23	rs117130854	A780G	Adenocarcinoma of lung	9.9802	0.354097
ENST00000646550.1	HCG23	rs115303880	G807T	Adenocarcinoma of lung	9.78789	0.247312
ENST00000646550.1	HCG23	rs3117098	C861T	Adenocarcinoma of lung	9.65962	0.226919
ENST00000646628.1	HCG23	rs9268474	C231T	Adenocarcinoma of lung	9.9912	0.345746
ENST00000646628.1	HCG23	rs17208657	C418T	Adenocarcinoma of lung	9.43617	0.137435
ENST00000646628.1	HCG23	rs57652561	C436T	Adenocarcinoma of lung	9.19702	0.0904839
ENST00000646628.1	HCG23	rs12525722	A437G	Adenocarcinoma of lung	10	NA
ENST00000646628.1	HCG23	rs117384660	A476G	Adenocarcinoma of lung	10	NA
ENST00000646628.1	HCG23	rs17202309	C487T	Adenocarcinoma of lung	10	NA
ENST00000646628.1	HCG23	rs9268475	C505T	Adenocarcinoma of lung	9.84955	0.22612
ENST00000646628.1	HCG23	rs3117099	C544T	Adenocarcinoma of lung	9.9202	0.261018
ENST00000646628.1	HCG23	rs117130854	A706G	Adenocarcinoma of lung	9.51293	0.155604
ENST00000646628.1	HCG23	rs115303880	G733T	Adenocarcinoma of lung	9.87412	0.239252
ENST00000646628.1	HCG23	rs3117098	C787T	Adenocarcinoma of lung	9.78739	0.20939
ENST00000646628.1	HCG23	rs17495592	A807G	Adenocarcinoma of lung	9.49035	0.148408
ENST00000646628.1	HCG23	rs117886263	A940G	Adenocarcinoma of lung	9.9635	0.294837
ENST00000646628.1	HCG23	rs117030612	C1174T	Adenocarcinoma of lung	9.68408	0.179889
ENST00000646628.1	HCG23	rs117680060	A1230G	Adenocarcinoma of lung	10	NA
ENST00000646628.1	HCG23	rs9268477	A1395G	Adenocarcinoma of lung	7.8941	0.0118726
ENST00000646628.1	HCG23	rs118171271	G1423T	Adenocarcinoma of lung	9.5713	0.166577
ENST00000646628.1	HCG23	rs117177076	A1424G	Adenocarcinoma of lung	9.18585	0.0850873
ENST00000646628.1	HCG23	rs118094977	C1459T	Adenocarcinoma of lung	10	NA
ENST00000646628.1	HCG23	rs116854236	A1460G	Adenocarcinoma of lung	9.18585	0.0850873
ENST00000646628.1	HCG23	rs117691618	A1574G	Adenocarcinoma of lung	9.27158	0.116388
ENST00000646628.1	HCG23	rs116938180	C1605T	Adenocarcinoma of lung	9.70724	0.184566
ENST00000646628.1	HCG23	rs17495612	C1705T	Adenocarcinoma of lung	7.8941	0.0118726
ENST00000646628.1	HCG23	rs60538826	C1739T	Adenocarcinoma of lung	9.99851	0.352401
ENST00000646628.1	HCG23	rs149171231	C1741T	Adenocarcinoma of lung	9.95898	0.292858
ENST00000646628.1	HCG23	rs146487240	A1743T	Adenocarcinoma of lung	9.7283	0.191042
ENST00000646628.1	HCG23	rs549096164	C1753T	Adenocarcinoma of lung	9.9293	0.27361
ENST00000646628.1	HCG23	rs561411181	G1757T	Adenocarcinoma of lung	9.90266	0.250585
ENST00000646628.1	HCG23	rs116993778	A1781G	Adenocarcinoma of lung	10	NA
ENST00000647036.1	HCG23	rs17208657	C717T	Adenocarcinoma of lung	10	NA
ENST00000647036.1	HCG23	rs57652561	C735T	Adenocarcinoma of lung	10	NA
ENST00000647036.1	HCG23	rs12525722	A736G	Adenocarcinoma of lung	10	NA
ENST00000647036.1	HCG23	rs117384660	A775G	Adenocarcinoma of lung	9.67736	0.155487
ENST00000647036.1	HCG23	rs17202309	C786T	Adenocarcinoma of lung	10	NA
ENST00000647036.1	HCG23	rs9268475	C804T	Adenocarcinoma of lung	9.8822	0.217448
ENST00000647036.1	HCG23	rs3117099	C843T	Adenocarcinoma of lung	9.627	0.143797
ENST00000647036.1	HCG23	rs117130854	A1005G	Adenocarcinoma of lung	9.99263	0.334795
ENST00000647036.1	HCG23	rs115303880	G1032T	Adenocarcinoma of lung	9.91866	0.246529
ENST00000647036.1	HCG23	rs3117098	C1086T	Adenocarcinoma of lung	9.97783	0.302645
ENST00000647036.1	HCG23	rs17495592	A1106G	Adenocarcinoma of lung	9.5653	0.13649
ENST00000647036.1	HCG23	rs117886263	A1239G	Adenocarcinoma of lung	6.95603	0.00653482
ENST00000647036.1	HCG23	rs117030612	C1473T	Adenocarcinoma of lung	10	NA
ENST00000647036.1	HCG23	rs117680060	A1529G	Adenocarcinoma of lung	10	NA
ENST00000647036.1	HCG23	rs9268477	A1694G	Adenocarcinoma of lung	10	NA
ENST00000647036.1	HCG23	rs118171271	G1722T	Adenocarcinoma of lung	8.83364	0.0572848
ENST00000647036.1	HCG23	rs117177076	A1723G	Adenocarcinoma of lung	8.94272	0.0851965
ENST00000647036.1	HCG23	rs118094977	C1758T	Adenocarcinoma of lung	8.90383	0.0682449
ENST00000647036.1	HCG23	rs116854236	A1759G	Adenocarcinoma of lung	8.90411	0.0682449
ENST00000647036.1	HCG23	rs117691618	A1873G	Adenocarcinoma of lung	9.99883	0.35087
ENST00000647036.1	HCG23	rs116938180	C1904T	Adenocarcinoma of lung	9.76848	0.183253
ENST00000647036.1	HCG23	rs17495612	C2004T	Adenocarcinoma of lung	9.6499	0.148035
ENST00000647036.1	HCG23	rs60538826	C2038T	Adenocarcinoma of lung	9.99883	0.35087
ENST00000647036.1	HCG23	rs149171231	C2040T	Adenocarcinoma of lung	9.97145	0.290808
ENST00000647036.1	HCG23	rs146487240	A2042T	Adenocarcinoma of lung	9.78275	0.186906
ENST00000647036.1	HCG23	rs549096164	C2052T	Adenocarcinoma of lung	9.94597	0.277072
ENST00000647036.1	HCG23	rs561411181	G2056T	Adenocarcinoma of lung	9.92631	0.252229
ENST00000647036.1	HCG23	rs116993778	A2080G	Adenocarcinoma of lung	10	NA
ENST00000647036.1	HCG23	rs118169940	G2144T	Adenocarcinoma of lung	7.27703	0.0182668
ENST00000647036.1	HCG23	rs117231421	C2159T	Adenocarcinoma of lung	10	NA
ENST00000647036.1	HCG23	rs118079998	C2176T	Adenocarcinoma of lung	10	NA
ENST00000647036.1	HCG23	rs72847907	A2184G	Adenocarcinoma of lung	9.99883	0.35087
